# Supplementary material for: RNA Sequencing Analysis and Atrial Natriuretic Peptide Production in Patients with Dilated and Ischemic Cardiomyopathy
Source: PLoS One. 2014 Mar 5;9(3):e90157. doi: 10.1371/journal.pone.0090157 (PMC3943898; doi:10.1371/journal.pone.0090157)
Supplement: Table S1 — Main statistical parameters of mapping step of analysis. (XLSX) [file pone.0090157.s005.xlsx]

## Sheet: Stats
Samples	#Reads	#Mapping_Reads	%_Mapping_Reads	#Pair_Reads	%Pair_REads	#Singleton	%Singleton
1 ICM	79627435	69222689	86.9332	63815626	80.1428	5407063	6.79045
5 ICM	72851618	63166520	86.7057	56826404	78.0029	6340116	8.70278
12 ICM	68672803	60683057	88.3655	56681942	82.5391	4001115	5.82635
22 ICM	89154353	77327829	86.7348	70335486	78.8918	6992343	7.84296
30 ICM	94001798	81444627	86.6416	74961670	79.7449	6482957	6.89663
31 ICM	70182024	61698788	87.9125	57304894	81.6518	4393894	6.26071
33 ICM	64467419	57624400	89.3853	53914378	83.6304	3710022	5.75488
36 ICM	94026479	82280585	87.5079	76300360	81.1477	5980225	6.36015
53 ICM	134287858	119536215	89.0149	111245252	82.8409	8290963	6.17402
61 ICM	88994932	77349908	86.915	70484676	79.2008	6865232	7.71418
64 ICM	62756879	55191022	87.9442	51490044	82.0469	3700978	5.89733
76 ICM	45112281	39848175	88.3311	36715276	81.3864	3132899	6.94467
110 ICM	37013820	31324815	84.6301	27633082	74.6561	3691733	9.97393
6 DCM	86853477	75168120	86.5459	67940656	78.2245	7227464	8.32144
8 DCM	113085490	98510490	87.1115	89268616	78.9391	9241874	8.17247
28 DCM	77812188	67875099	87.2294	62736728	80.6258	5138371	6.60356
62 DCM	61720191	53915831	87.3553	49158716	79.6477	4757115	7.70755
63 DCM	70410846	62225237	88.3745	58048510	82.4426	4176727	5.93194
68 DCM	37424591	32629995	87.1886	29710186	79.3868	2919809	7.80185
69 DCM	73543849	65580754	89.1723	61214190	83.235	4366564	5.93736
80 DCM	87965832	76975523	87.5062	70429878	80.065	6545645	7.44112
83 DCM	86343329	75633649	87.5964	69767168	80.802	5866481	6.79437
86 DCM	93833136	82281526	87.6892	75386128	80.3406	6895398	7.34857
87 DCM	130147017	111834754	85.9296	100465540	77.1939	11369214	8.73567
96 DCM	55515321	49432006	89.0421	45957256	82.783	3474750	6.25908
105 DCM	68543412	60040945	87.5955	54739248	79.2449	5301697	7.7348
3 CNT	97621266	85665252	87.7527	79374906	81.309	6290346	6.44362
16 CNT	60963425	54685395	89.702	51472396	84.4316	3212999	5.27037
38 CNT	92662648	80711239	87.1022	74044596	79.9077	6666643	7.19453
66 CNT	75520116	66234945	87.705	61401482	81.3048	4833463	6.40023
67 CNT	87468430	75599010	86.4301	68145420	77.9086	7453590	8.52146
75 CNT	85559883	76076899	88.9166	71274244	83.3033	4802655	5.61321
114 CNT	81326487	68887015	84.7043	60632874	74.5549	8254141	10.1494
130 CNT	61205140	53278585	87.0492	48708462	79.5823	4570123	7.46689
135 CNT	52371130	36956578	70.5667	37418613	82.4154	753773	1.43929
136 CNT	37013820	31324815	84.6301	27633082	79.2449	3691733	9.97393
